# Supplementary material
Source: MDPI journal article supplement (https://www.mdpi.com/2076-3417/11/14/6484)
Supplement: s1 [file s1]

Table S1. Geographical and climatic data of eight wild hop sampling sites in northwestern Croatia

| No. | Locality   | Latitude (N) | Longitude (E) | Altitude (m a.s.l.) | Mean Annual Temperature (°C) | Annual Precipitation (mm) |
|-----|------------|--------------|---------------|---------------------|------------------------------|---------------------------|
| P1  | Ozalj      | 45.59        | 15.41         | 301.20              | 9.4                          | 1215                      |
| P2  | Rugvica    | 45.66        | 16.29         | 93.06               | 10.5                         | 911                       |
| P3  | Varaždin   | 46.27        | 16.31         | 183.85              | 10.2                         | 883                       |
| P4  | Kalnik     | 46.10        | 16.44         | 162.13              | 10.1                         | 885                       |
| P5  | Križevci   | 46.05        | 16.47         | 158.86              | 10.4                         | 874                       |
| P6  | Ludbreg    | 46.21        | 16.64         | 144.83              | 9.6                          | 865                       |
| P7  | Prelog     | 46.34        | 16.61         | 145.23              | 10.3                         | 818                       |
| P8  | Novo Virje | 46.11        | 17.12         | 113.72              | 10.8                         | 776                       |

\*
