# Supplementary material
Source: MDPI journal article supplement (https://www.mdpi.com/2076-3417/11/14/6484)
Supplement: s1 [file s1]

Table S2. Pairwise  $F_{ST}$  values between wild hop populations (lower diagonal) and their significance (upper diagonal). ns = non-significant value; \* = significant at  $0.01 < P < 0.05$

| No. | Population | P1    | P2    | P3    | P4    | P5    | P6    | P7    | P8 |
|-----|------------|-------|-------|-------|-------|-------|-------|-------|----|
| P1  | Ozalj      |       | ns    | ns    | ns    | ns    | ns    | *     | ns |
| P2  | Rugvica    | 0.022 |       | ns    | ns    | ns    | ns    | ns    | ns |
| P3  | Varaždin   | 0.016 | 0.019 |       | ns    | ns    | ns    | ns    | ns |
| P4  | Kalnik     | 0.033 | 0.022 | 0.015 |       | ns    | ns    | ns    | ns |
| P5  | Križevci   | 0.015 | 0.031 | 0.001 | 0.022 |       | ns    | ns    | ns |
| P6  | Ludbreg    | 0.024 | 0.031 | 0.015 | 0.011 | 0.002 |       | ns    | ns |
| P7  | Prelog     | 0.034 | 0.008 | 0.000 | 0.000 | 0.008 | 0.010 |       | ns |
| P8  | Novo Virje | 0.010 | 0.033 | 0.000 | 0.015 | 0.000 | 0.005 | 0.002 |    |
